# Supplementary material
Source: HighWire-hosted journal article supplement (https://jnm.snmjournals.org/highwire/filestream/94962/field_highwire_adjunct_files/0/166272_Supplemental_data.pdf)
Supplement: 166272_Supplemental_data.pdf [file 166272_Supplemental_data.pdf]

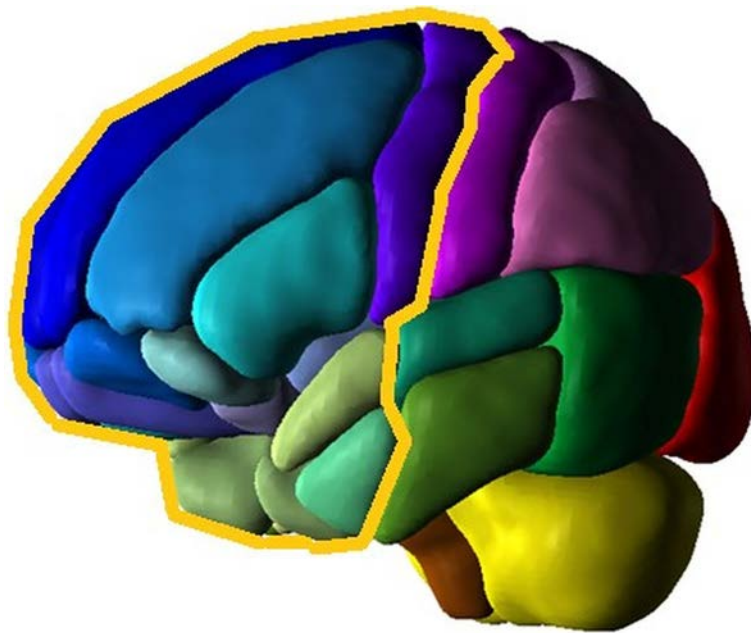

**Supplemental Figure 1:** Surface rendering of the VOIs used in the Hammers N30R83 Maximum Probability atlas, with indication of the frontotemporal regions included for the survival analysis.

**Supplemental Table 1:** VOI-based classification matrix of ALS, PLS and controls.

| Group | % correct | ALS | CON | PLS |
|-------|-----------|-----|-----|-----|
| ALS   | 77.7      | 136 | 15  | 24  |
| PLS   | 20.0      | 6   | 2   | 2   |
| CON   | 95.0      | 1   | 19  | 0   |
| Total | 76.6      | 147 | 34  | 24  |

CON = controls, ALS = Amyotrophic Lateral Sclerosis, PLS = Primary Lateral Sclerosis
